# Supplementary material
Source: HighWire-hosted journal article supplement (http://ajnr-stage2.highwire.org/highwire/filestream/183319/field_highwire_adjunct_files/0/0097.pdf)
Supplement: 0097.pdf [file 0097.pdf]

# Prevalence of Intracranial Aneurysms in Hereditary Hemorrhagic Telangiectasia: report from a single reference center

## Supplementary Material

S. Fig 1: Study Flow Chart

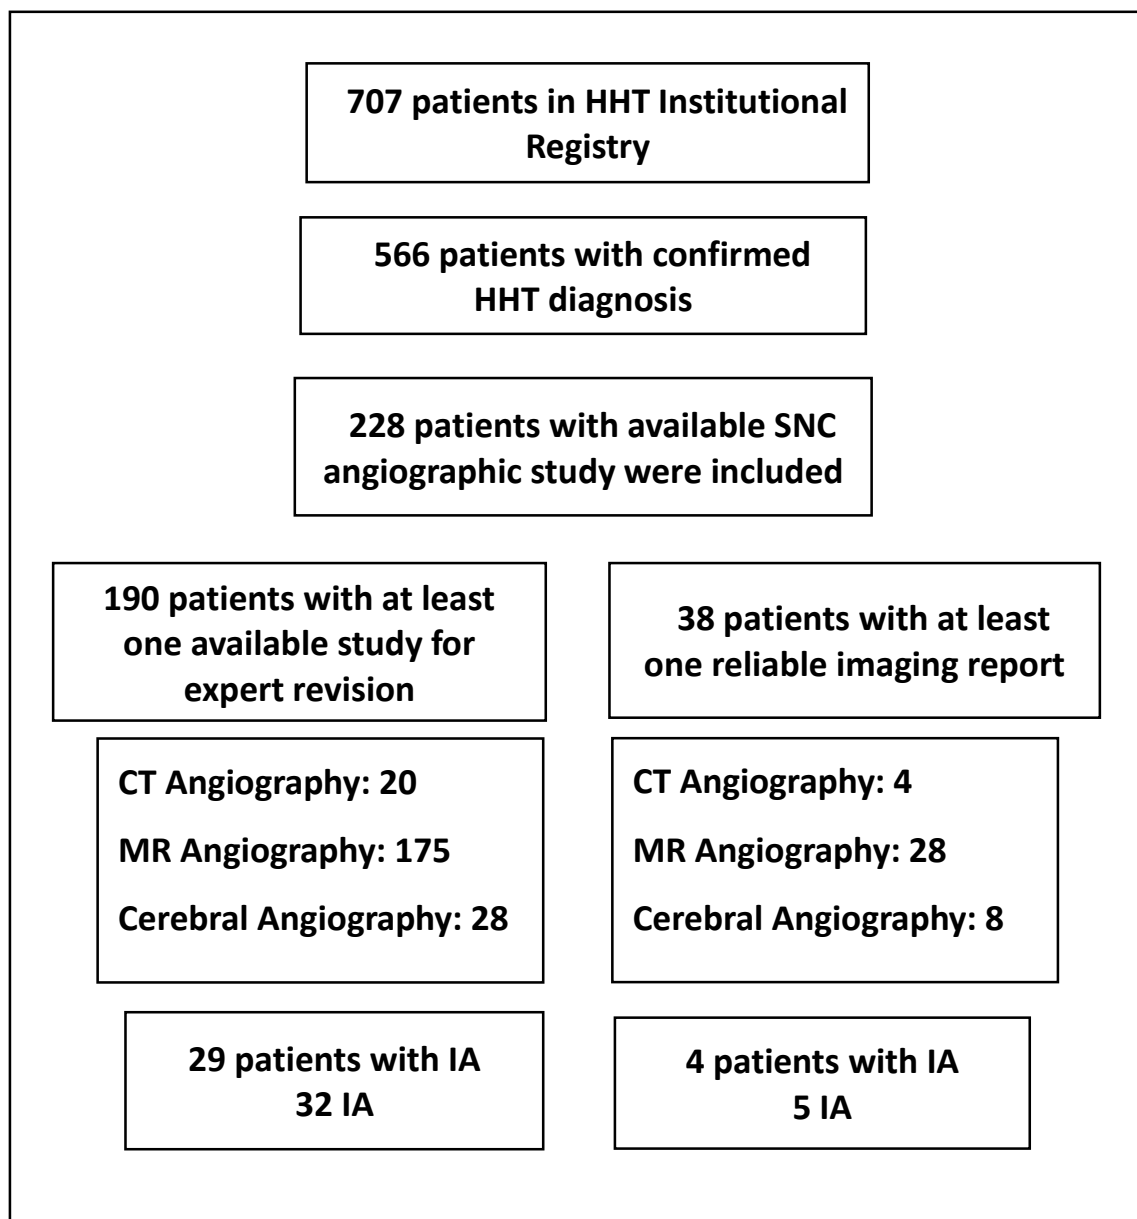

Abbreviations: HHT: hereditary hemorrhagic telangiectasia, IA: intracranial aneurysm.
